# Supplementary material for: Measures of infection prevention and incidence of SARS-CoV-2 infections in cancer patients undergoing radiotherapy in Germany, Austria and Switzerland
Source: Springer Nature journal article supplement (doi:10.1007/s00066-020-01681-1), 2020-09-10
Supplement: MOESM1 [file 18366026]

Fragebogen zur **Situation der Strahlentherapien in Deutschland während  
der SARS-CoV-2-Pandemie**

**\* 1. In welchem Land sind Sie tätig?**

Deutschland

Österreich

Schweiz

**\* 2. In welcher Einrichtung sind Sie tätig?**

Einzel- oder Gemeinschaftspraxis

Medizinisches Versorgungszentrum (MVZ)/ Primärversorgungszentrum (PVZ)

Nicht-universitäre Klinik/Spital

Universitätsklinik/-spital

**3. Falls in Deutschland, geben Sie bitte an, in welchem Bundesland Ihre Institution liegt**

**\* 4. Haben Sie seit Beginn der SARS-CoV-2-Pandemie bereits Patienten gehabt, die während der Bestrahlungsserie eine nachgewiesene COVID-19-Erkrankung hatten?**

Ja

Nein

**5. Falls ja, wie viele nachgewiesenen COVID-19-Fälle haben Sie gehabt?**

**6. Falls ja, wie sind Sie mit diesen Patienten umgegangen?**

|                                                               | Bestrahlung komplett<br>abgebrochen | Bestrahlung >1 Woche<br>unterbrochen | Bestrahlung<br>weitergeführt bzw. <1<br>Woche unterbrochen | Anderes Vorgehen     |
|---------------------------------------------------------------|-------------------------------------|--------------------------------------|------------------------------------------------------------|----------------------|
| Asymptomatische<br>oder gering<br>symptomatische<br>Patienten | <input type="text"/>                | <input type="text"/>                 | <input type="text"/>                                       | <input type="text"/> |
| Stärker<br>symptomatische<br>Patienten                        | <input type="text"/>                | <input type="text"/>                 | <input type="text"/>                                       | <input type="text"/> |

**Kommentar**

**\* 7. Wie viele Patienten befinden sich derzeit bei Ihnen in einer Bestrahlungsserie (Pro Tag)?**

**\* 8. Wie viele Patienten befanden sich kurz vor Beginn der SARS-CoV-2-Pandemie (Anfang 2/2020) in der Bestrahlungsserie (pro Tag)?**

**\* 9. Führen Sie für die Patienten in der Bestrahlungsserie ein COVID-19-Screening (Screening irgendeiner Art) durch?**

Ja

Nein

**10. Falls ja, wie oft pro Woche untersuchen Sie?**

Befragung nach  
typischen  
Symptomen

Temperaturmessu  
ngen

pO<sub>2</sub>-  
Sättigungsmessun  
gen

Pulsmessungen

Rachenabstriche  
und/oder nasaler  
Abstrich

**\* 11. Gab es seit Beginn der SARS-CoV-2-Pandemie Mitarbeiter in der Radioonkologie, die positiv auf COVID-19 getestet wurden?**

Ja

Nein

**12. Falls ja, geben Sie bitte die Anzahl der Fälle und die Gesamtanzahl der Mitarbeiter an**

|                 | Anzahl der positiv Getesteten | Gesamtzahl           |
|-----------------|-------------------------------|----------------------|
| Ärzte           | <input type="text"/>          | <input type="text"/> |
| MTRA            | <input type="text"/>          | <input type="text"/> |
| Medizinphysiker | <input type="text"/>          | <input type="text"/> |
| Pflegekräfte    | <input type="text"/>          | <input type="text"/> |
| Administration  | <input type="text"/>          | <input type="text"/> |

**\* 13. Werden/wurden in Ihrer Einrichtung Antikörpertests durchgeführt, um eine durchgemachte Infektion zu erkennen und so Mitarbeiter gezielt einsetzen zu können?**

Ja

Nein

**\* 14. Haben Sie Ihre Mitarbeiter in Gruppen eingeteilt?**

|                 | Ja/Nein              |
|-----------------|----------------------|
| Ärzte           | <input type="text"/> |
| MTRA            | <input type="text"/> |
| Medizinphysiker | <input type="text"/> |
| Pflegekräfte    | <input type="text"/> |
| Sonstige        | <input type="text"/> |

**Kommentar**

**\* 15. Erfolgt(e) eine Anpassung des Dienstplans im Rahmen der COVID-19-Pandemie?**

|                                                                                                         | Ja/Nein                  |
|---------------------------------------------------------------------------------------------------------|--------------------------|
| Homeoffice für Ärzte                                                                                    | <input type="checkbox"/> |
| Homeoffice für MTRA                                                                                     | <input type="checkbox"/> |
| Homeoffice für Medizinphysiker                                                                          | <input type="checkbox"/> |
| Homeoffice für Pflegekräfte                                                                             | <input type="checkbox"/> |
| Homeoffice für Mitarbeitern mit Risikofaktoren (Alter, Lungenvorerkrankungen, Herz-Kreislaufkrankungen) | <input type="checkbox"/> |

**\* 16. Für wen besteht innerhalb der Radioonkologie die Pflicht Masken zu tragen (ohne Symptome bzw. ohne nachgewiesener SARS-CoV-2-Infektion)?**

|                 | Standard Mund-Nasen-Schutz | FFP2/3 Maske             |
|-----------------|----------------------------|--------------------------|
| Patienten       | <input type="checkbox"/>   | <input type="checkbox"/> |
| Ärzte           | <input type="checkbox"/>   | <input type="checkbox"/> |
| MTRA            | <input type="checkbox"/>   | <input type="checkbox"/> |
| Medizinphysiker | <input type="checkbox"/>   | <input type="checkbox"/> |
| Pflegekräfte    | <input type="checkbox"/>   | <input type="checkbox"/> |
| Sonstige        | <input type="checkbox"/>   | <input type="checkbox"/> |

**Kommentar**

**\* 17. Haben Sie Masken in ausreichender Menge zur Verfügung?**

|                            | Keine Probleme           | Teilweise Probleme       | Starke Probleme          |
|----------------------------|--------------------------|--------------------------|--------------------------|
| Standard Mund-Nasen-Schutz | <input type="checkbox"/> | <input type="checkbox"/> | <input type="checkbox"/> |

**\* 18. Führen Sie für Ihre Mitarbeiter ein COVID-19-Screening durch?**

Ja

Nein

**19. Falls ja, wie viele Mitarbeiter befragen / untersuchen Sie?**

Anzahl pro Woche

Befragung nach  
typischen Symptomen

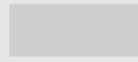

Temperaturmessungen

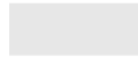

pO2-  
Sättigungsmessungen

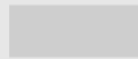

Pulsmessungen

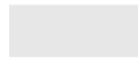

Rachenabstriche

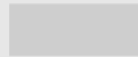

**Anderes Vorgehen**

A large, empty rectangular box with a light gray background, intended for describing other procedures.



**\* 20. Weichen Sie von Ihrem bisherigen Standard der Strahlentherapie bei kurativen Konzepten wegen der SARS-CoV-2-Pandemie ab?**

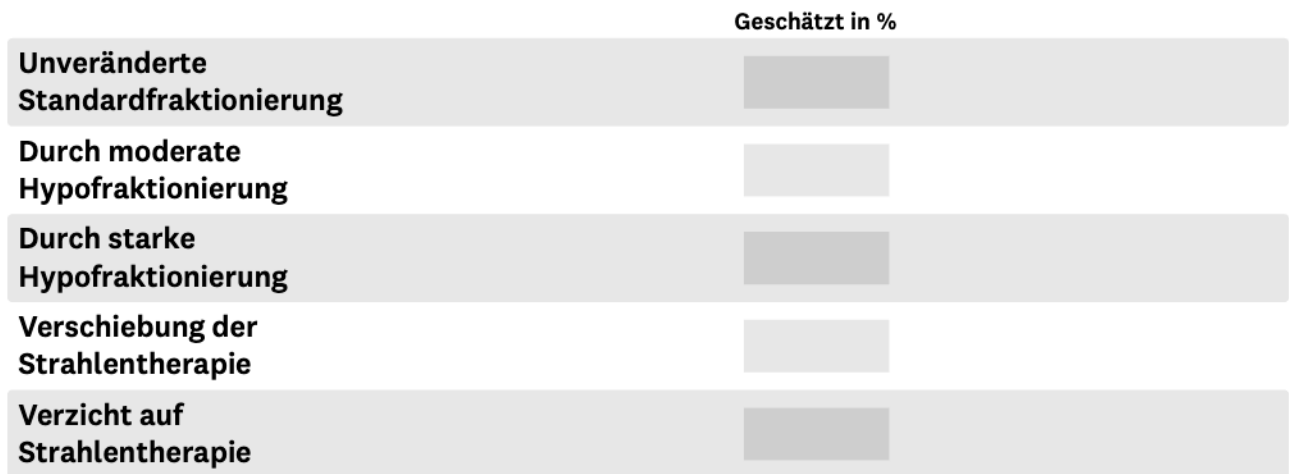

**Kommentar**

**\* 21. Weichen Sie von Ihrem bisherigen Standard der Strahlentherapie bei palliativen Konzepten wegen der SARS-CoV-2-Pandemie ab?**

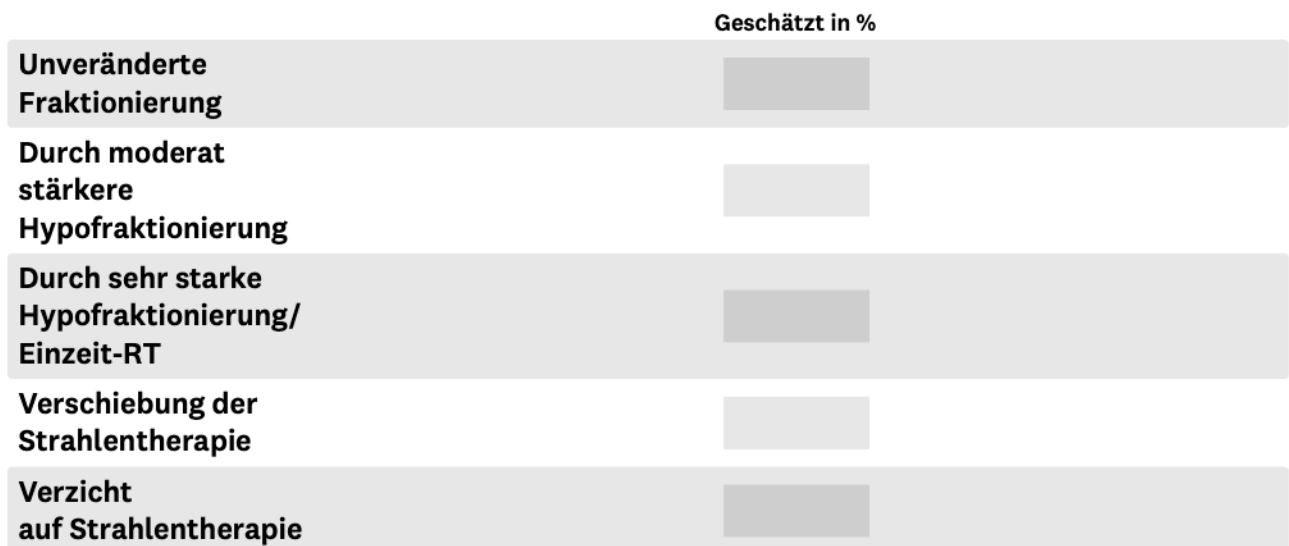

**\* 22. Weichen Sie von Ihrem bisherigen Standard der Strahlentherapie bei Entzündungsbestrahlungen wegen der SARS-CoV-2-Pandemie ab?**

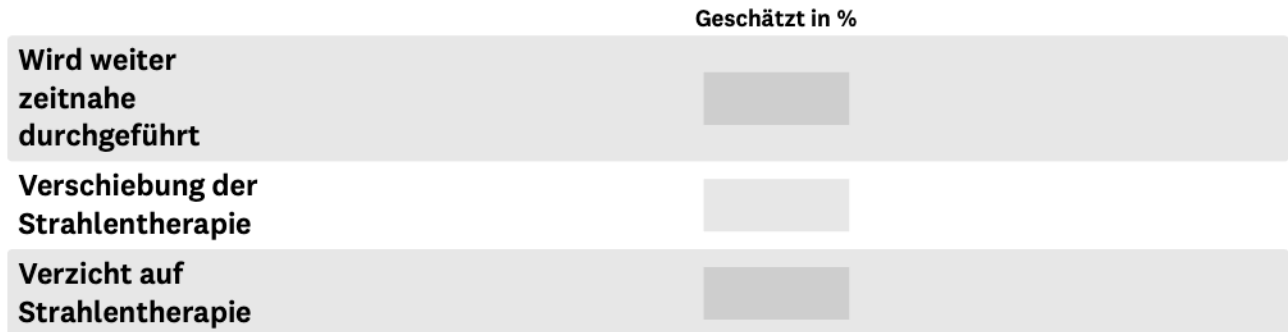

**Kommentar**

**\* 23. Wie gehen Sie mit zusätzlichen medikamentösen Tumorthérapien parallel zur Bestrahlung um (geschätzt in %)?**

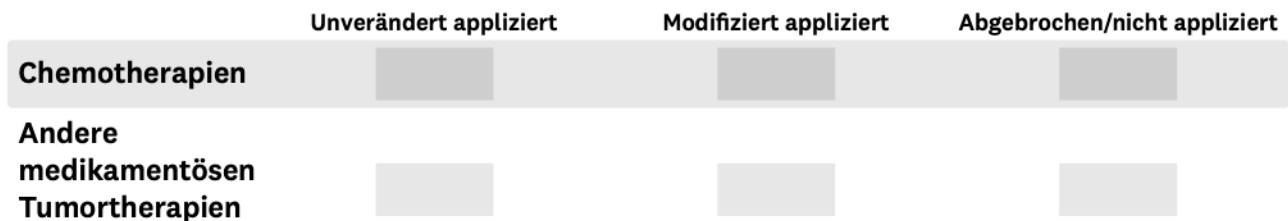

**Kommentar**

**\* 24. Wie gehen Sie mit Nachsorgen um?**

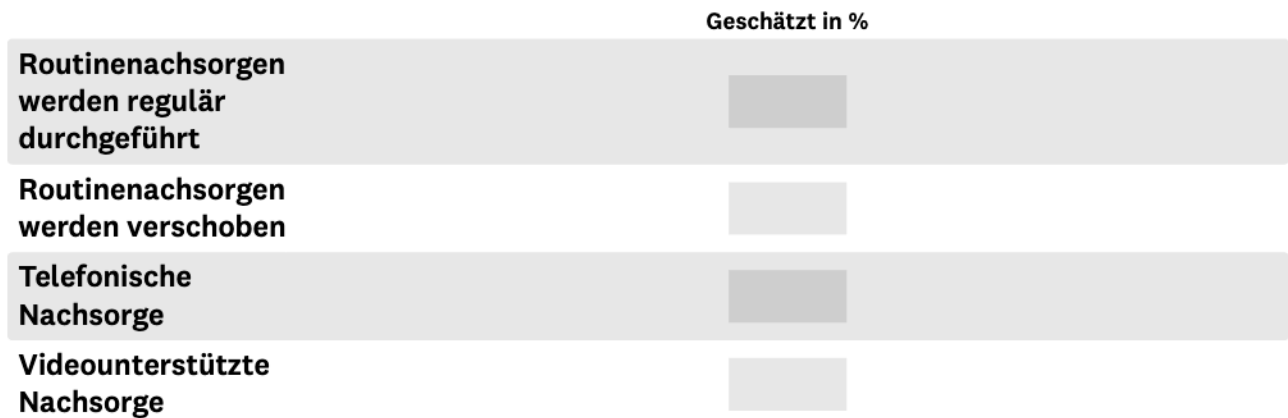

**Kommentar**

[Empty text box for comments]

**25. Wollen Sie uns noch etwas mitteilen?**

[Empty text box for additional information]
